# Supplementary material for: Immune Tolerance-Adjusted Personalized Immunogenicity Prediction for Pompe Disease
Source: PubMed Central journal article supplement (PMC8242953; doi:10.3389/fimmu.2021.636731), 2021-06-16

## Supplementary Material

**Supplementary Table S1. IOPD Cohort and input data used for PIMA risk assessment calculations.**

| Patient ID | Age at ERT initiation (weeks) | PIMA V1 (Supertype alleles) | PIMA V2, V3, V3J                |                                 | GAA Mutation(s)                                  | ADA  |
|------------|-------------------------------|-----------------------------|---------------------------------|---------------------------------|--------------------------------------------------|------|
|            |                               |                             | Specific HLA DR Allele          | HLA DR Allele Proxy, if used    |                                                  |      |
| 818-2      | 21.7                          | DRB1*0801/<br>DRB1*1301     | DRB1*0801/<br>DRB1*1301         |                                 | c.437delT<br>c.2482_2646del                      | HSAT |
| 818-3      | 23.5                          | DRB1*0401/<br>DRB1*1501     | <b>DRB1*0403/<br/>DRB1*1501</b> | <b>DRB1*0404</b>                | c.2482_2646del                                   | HSAT |
| PK-013     | 21.7                          | DRB1*0701/<br>DRB1*1101     | DRB1*0701/<br>DRB1*1601         |                                 | c.2236T>C<br>c.2560C>T                           | HSAT |
| PK-014     | 59                            | DRB1*0901/<br>DRB1*1101     | DRB1*0901/<br><b>DRB1*1110</b>  | <b>DRB1*1101</b>                | c.655G>A<br>c.1979G>A                            | HSAT |
| PK-015     | 34.8                          | DRB1*1101/<br>DRB1*1301     | DRB1*1104/<br>DRB1*1302         |                                 | c.2560C>T<br>c.1129G>C<br>c.2770T>C              | HSAT |
| PK-023     | 20                            | DRB1*0401/<br>DRB1*0801     | <b>DRB1*0403/<br/>DRB1*0803</b> | <b>DRB1*0404/<br/>DRB1*0801</b> | c.2238G>A<br>c.1843G>A                           | SIT  |
| PK-024     | 13.5                          | DRB1*0101/<br>DRB1*0701     | DRB1*0101/<br>DRB1*0701         |                                 | c.1933G>A                                        | LT   |
| PK-025     | 30.4                          | DRB1*1501/<br>DRB1*1501     | <b>DRB1*1503/<br/>DRB1*1503</b> | <b>DRB1*1501/<br/>DRB1*1501</b> | c.1710C>G<br>c.2560C>T                           | LT   |
| PK-026     | 23.5                          | DRB1*0801/<br>DRB1*0901     | DRB1*0802/<br>DRB1*0901         |                                 | c.1802C>T<br>c.1726G>A<br>c.2065G>A<br>c.1099T>C | LT   |
| PK-027     | 32.2                          | DRB1*1101/<br>DRB1*1101     | DRB1*1101/<br><b>DRB1*1602</b>  | <b>DRB1*1601</b>                | c.2297A>C                                        | LT   |
| PK-029     | 13.1                          | DRB1*0801/<br>DRB1*1301     | <b>DRB1*0811/<br/>DRB1*1301</b> | <b>DRB1*0801</b>                | c.1933G>A                                        | LT   |
| PK-030     | 30.4                          | DRB1*1501/<br>DRB1*1501     | DRB1*1501/<br>DRB1*1501         |                                 | c.655G>A                                         | LT   |
| PK-031     | 26.1                          | DRB1*1101/<br>DRB1*1501     | DRB1*1101/<br>DRB1*1501         |                                 | c.1210G>A<br>c.2482_2646del                      | LT   |
| PK-032     | 28.7                          | DRB1*0401/<br>DRB1*0401     | <b>DRB1*0403/<br/>DRB1*0403</b> | <b>DRB1*0404/<br/>DRB1*0404</b> | c.2815_2816del<br>c.1935C>A                      | LT   |
| PK-033     | 14.8                          | DRB1*1101/<br>DRB1*1501     | DRB1*1104/<br>DRB1*1501         |                                 | c.2741delinsGAC                                  | LT   |
| PK-034     | 26.1                          | DRB1*0401/<br>DRB1*0801     | <b>DRB1*0406/<br/>DRB1*0803</b> | <b>DRB1*0404/<br/>DRB1*0801</b> | c.1411_1414del<br>c.460_465del                   | HSAT |
| PK-035     | 52.1                          | DRB1*0701/<br>DRB1*1301     | DRB1*0701/<br>DRB1*1302         |                                 | c.1942G>A                                        | HSAT |
| PK-036     | 30.4                          | DRB1*0401/<br>DRB1*1501     | DRB1*0401/<br>DRB1*1501         |                                 | c.525delT<br>c.2482_2646del                      | HSAT |
| PK-102     | 9                             | DRB1*1101/<br>DRB1*1501     | DRB1*1104/<br>DRB1*1501         |                                 | c.1293_1312del<br>c.1716C>G                      | LT   |
| PK-104     | 4                             | DRB1*0801/<br>DRB1*1301     | DRB1*0804/<br>DRB1*1302         |                                 | c.1082C>T<br>c.2560C>T                           | LT   |
| PK-105     | 0                             | DRB1*0401/<br>DRB1*1501     | DRB1*0401/<br>DRB1*1502         |                                 | c.947A>G<br>c.2482_2646del                       | LT   |
| PK-106     | 4                             | DRB1*0101/<br>DRB1*0301     | <b>DRB1*0102/<br/>DRB1*0301</b> | <b>DRB1*0104</b>                | c.2297A>C                                        | LT   |
| PK-107     | 28                            | DRB1*0701/<br>DRB1*1501     | DRB1*0701/<br>DRB1*1502         |                                 | c.525delT<br>c.1655T>C                           | LT   |
| PK-109     | 21                            | DRB1*0401/<br>DRB1*1301     | DRB1*0405/<br>DRB1*1302         |                                 | c.925G>A                                         | HSAT |

| Patient ID | Age at ERT initiation (weeks) | PIMA V1 (Supertype alleles) | PIMA V2, V3, V3J                |                              | GAA Mutation(s)                                  | ADA      |
|------------|-------------------------------|-----------------------------|---------------------------------|------------------------------|--------------------------------------------------|----------|
|            |                               |                             | Specific HLA DR Allele          | HLA DR Allele Proxy, if used |                                                  |          |
| PK-110     | 39                            | DRB1*0301/<br>DRB1*0401     | DRB1*0301/<br>DRB1*0401         |                              | c.1799G>T<br>c.525delT                           | SIT      |
| PK-111     | 2                             | DRB1*1101/<br>DRB1*1101     | DRB1*1102/<br>DRB1*1104         |                              | c.1979G>A<br>c.2560C>T                           | LT       |
| PK-113     | 36.5                          | DRB1*0301/<br>DRB1*0701     | DRB1*0301/<br>DRB1*0701         |                              | c.525delT<br>c.1841C>A                           | LT       |
| PK-114     | 36.5                          | DRB1*0101/<br>DRB1*1301     | DRB1*0101/<br>DRB1*1302         |                              | c.1408_1410del<br>c.925G>A                       | LT       |
| PK-115     | 31                            | DRB1*0301/<br>DRB1*1101     | DRB1*0301/<br><b>DRB1*1103</b>  | <b>DRB1*1102</b>             | c.1221C>A<br>c.1281G>T<br>c.2296T>A<br>c.1564C>T | LT       |
| PK-116     | 16                            | DRB1*0701/<br>DRB1*1301     | DRB1*0701/<br>DRB1*1301         |                              | c.655G>A<br>c.2167_2179delinsTGCGACGTGG          | LT       |
| PK-118     | 44                            | DRB1*0401/<br>DRB1*0401     | DRB1*0401/<br>DRB1*0405         |                              | c.1402A>T<br>c.1841C>A                           | LT       |
| PK-121     | 5                             | DRB1*0401/<br>DRB1*0701     | DRB1*0404/<br>DRB1*0701         |                              | c.2482_2646del<br>c.670C>T                       | LT       |
| PK-122     | 18                            | DRB1*0401/<br>DRB1*0401     | DRB1*0401/<br>DRB1*0401         |                              | c.670C>T<br>c.799_803delinsA                     | SIT      |
| PK-123     | 25                            | DRB1*0801/<br>DRB1*1101     | DRB1*0804/<br>DRB1*1102         |                              | c.525delT<br>c.1979G>A                           | SIT      |
| PK-016     | 36.5                          | DRB1*0401/<br>DRB1*0401     | DRB1*0401/<br>DRB1*0404         |                              | c.2012T>G<br>c.2188G>T                           | HSAT     |
| PK-028     | 2.2                           | DRB1*0101/<br>Not assigned  | DRB1*0101/<br><b>DRB1*1401</b>  | <b>DRB1*13169</b>            | c.525delT<br>c.1642G>T<br>c.1880C>T              | LT       |
| PK-101     | 16                            | DRB1*0401/<br>DRB1*1501     | DRB1*0405/<br><b>DRB1*1503</b>  | <b>DRB1*1501</b>             | c.1710C>G<br>c.953T>C                            | HSAT     |
| PK-124     | 23.5                          | DRB1*0301/<br>DRB1*0401     | DRB1*0301/<br>DRB1*0401         |                              | c.307T>G<br>c.2482_2646del                       | HSAT     |
| PK-126     | 19                            | DRB1*0101/<br>DRB1*0701     | DRB1*0101/<br>DRB1*0701         |                              | c.1979G>A<br>c.2560C>T                           | HSAT     |
| PK-127     | 19                            | DRB1*0401/<br>DRB1*0801     | <b>DRB1*0407/<br/>DRB1*0802</b> | <b>DRB1*0408/</b>            | c.1210G>A                                        | SIT/High |
| PK-128     | 42                            | DRB1*0301/<br>DRB1*1101     | DRB1*0301/<br>DRB1*1104         |                              | c.706delG<br>c.1805C>T                           | SIT/Low  |
| PK-125     | 13                            | DRB1*1101/<br>DRB1*1301     | DRB1*1104/<br>DRB1*1302         |                              | c.307T>G<br>c.917C>T<br>c.2528T>C                | LT       |
| PK-120     | 20.9                          | DRB1*1101/<br>DRB1*1501     | DRB1*1101/<br>DRB1*1501         |                              | c.148_859-11del<br>c.685_686insCGGC<br>c.1726G>A | HSAT     |
| PK-130     | 7                             | DRB1*0101/<br>DRB1*0301     | DRB1*0103/<br>DRB1*0301         |                              | c.953T>C<br>c.2482_2646del                       | LT       |
| PK-131     | 8                             | DRB1*0101/<br>DRB1*0301     | DRB1*0101/<br>DRB1*0301         |                              | c.925G>A<br>c.1841C>A                            | LT       |
| PK-134     | 6.7                           | DRB1*0801/<br>DRB1*0801     | DRB1*0802/<br>DRB1*0802         |                              | c.2104C>T                                        | LT       |
| PK-136     | 12                            | DRB1*0301/<br>DRB1*1501     | DRB1*0301/<br>DRB1*1501         |                              | c.1441T>C<br>c.2481+102_2646+31del               | LT       |
| PK-144     | 1.1                           | DRB1*0901/<br>DRB1*1501     | DRB1*0901/<br>DRB1*1502         |                              | c.1935C>A<br>c.1726G>A<br>c.2024_2026del         | LT       |

**Bolded and italicized allele is for a selected proxy allele based on pocket similarity.**

**Supplementary Table S2. Selection of putative regulatory and T effector epitopes in GAA.** The human GAA complete sequence was evaluated for potential regulatory epitopes using the EpiMatrix and Janus Matrix tools. Table shows the EpiMatrix cluster score (binding probability Z-score) and the number of human matches to the other human proteins that are conserved within the GAA-epitope at its TCR-facing residues. JanusMatrix score is a measure of TCR conservation where a value  $> 2$  is considered significant and may be putative tolerogenic epitopes. Peptides were synthesized and evaluated in the *in vitro* HLA binding assay and for their inhibitory capacity in the Tetanus Toxoid Bystander Suppression assay (TTBSA). Peptides hGAA 1a, 1b, 6 and 11 (denoted by \* in the table) were shown to exhibit significant suppression in the TTBSA similar to well-established Tregitopes. Additionally, two GAA-derived T effector epitopes having predicted binding across multiple HLA alleles and low cross-conservation (JMX scores  $< 2$ ) were selected and included in the TTBSA as negative controls.

| Peptide Name | EpiMatrix cluster score | Number of human matches | Janus Homology score |
|--------------|-------------------------|-------------------------|----------------------|
| hGAA-1a *    | 24.34                   | 41                      | 4.75                 |
| hGAA-1b *    | 32.32                   | 29                      | 4.50                 |
| hGAA-2       | 17.84                   | 33                      | 4.50                 |
| hGAA-3       | 17.80                   | 14                      | 3.64                 |
| hGAA-4       | 6.54                    | 14                      | 3.20                 |
| hGAA-5       | 38.19                   | 29                      | 4.05                 |
| hGAA-6 *     | 40.21                   | 21                      | 5.30                 |
| hGAA-7       | 22.09                   | 28                      | 4.83                 |
| hGAA-8       | 30.76                   | 37                      | 7.29                 |
| hGAA-9       | 51.13                   | 27                      | 3.32                 |
| hGAA-10      | 12.88                   | 24                      | 7.29                 |
| hGAA-11 *    | 22.32                   | 22                      | 2.67                 |
| hGAA-12      | 0.96                    | 7                       | 3.50                 |
| hGAA-13      | 1.01                    | 7                       | 7.00                 |
| hGAA-14      | 2.06                    | 18                      | 9.00                 |
| hGAA-15      | 5.60                    | 7                       | 2.25                 |
| hGAA-16      | 12.08                   | 12                      | 2.40                 |
| hGAA-17      | 2.65                    | 10                      | 4.00                 |
| hGAA-18      | 0.74                    | 8                       | 8.00                 |
| hGAA-19      | 11.26                   | 10                      | 3.33                 |
| hGAA-20      | 16.47                   | 13                      | 2.43                 |
| hGAA-Teff-1  | 5.3                     | 8                       | 1.67                 |
| hGAA-Teff-2  | 18.94                   | 6                       | 1.44                 |

**Supplementary Figure S1. Comparison of the area under the ROC curve (AUC) among the univariate and multivariable logistic regression models. A)** AUC values to quantify model accuracy ranged from 0.58 to 0.67 for the univariate logistic regression model, which incorporates PIMA V1-V3J scores. **B)** The AUC values ranged from 0.74 to 0.76 for the multivariable logistic regression model, which incorporates both PIMA V1-V3J scores and age in weeks at initiation of ERT. While accuracy using PIMA scores alone was moderate, the AUCs for the four scoring algorithms were increased above 0.7 after incorporating the age variable, improving the model's ability to classify the ADA status of the Pompe patients. AUCs were calculated using the pROC package with R. Notably, while the addition of age increased area under the ROC curve for models employing all PIMA versions, due to the fixed age values across models and small sample size, it also reduced sensitivity, specificity, PPV and NPV.

**A)**

| Model 1  | AUC  | PPV | NPV | Sens | Spec |
|----------|------|-----|-----|------|------|
| PIMA V1  | 0.60 | 48% | 71% | 68%  | 52%  |
| PIMA V2  | 0.59 | 47% | 72% | 74%  | 45%  |
| PIMA V3  | 0.58 | 46% | 70% | 68%  | 48%  |
| PIMA V3J | 0.67 | 57% | 76% | 68%  | 66%  |

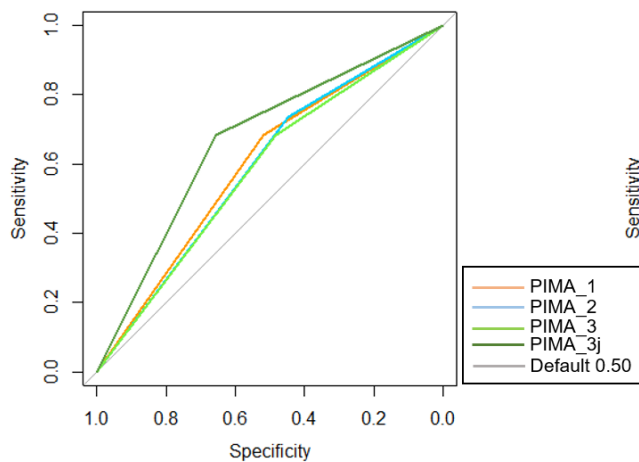

**B)**

| Model 2            | AUC  | PPV | NPV | Sens | Spec |
|--------------------|------|-----|-----|------|------|
| PIMA V1 + Age/ERT  | 0.75 | 36% | 53% | 63%  | 28%  |
| PIMA V2 + Age/ERT  | 0.74 | 36% | 53% | 63%  | 28%  |
| PIMA V3 + Age/ERT  | 0.74 | 36% | 53% | 63%  | 28%  |
| PIMA V3J + Age/ERT | 0.76 | 41% | 63% | 63%  | 41%  |

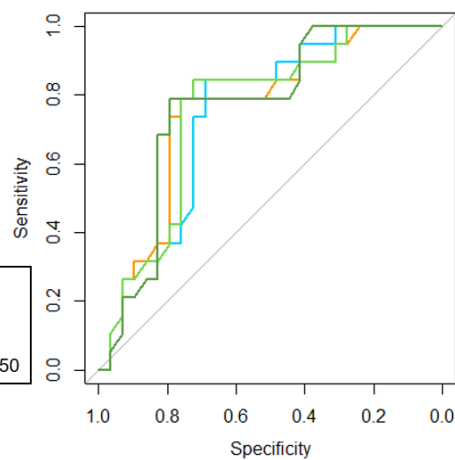

**Supplementary Figure S2. GAA-derived T effector peptides did not inhibit memory CD4 T cell response to Tetanus Toxoid (TT) in healthy donors.** PBMCs from healthy donors were stimulated with 0.5  $\mu\text{g/ml}$  of TT with or without FV621 or GAA-derived Teff peptides and analyzed at six days post-stimulation by flow cytometry for inhibition of CD4<sup>+</sup> T cell proliferation. Data show the CD4 T cell proliferation averaged from 3 healthy donors in the experiments. FV621 was used as a positive control where significant suppressive capacity of TT-induced CD4<sup>+</sup> T cell proliferation was observed. P values \*\*\*\* = <0.0001 represents statistical significance between TT stimulation alone vs TT+ peptide using a two-tailed t test.

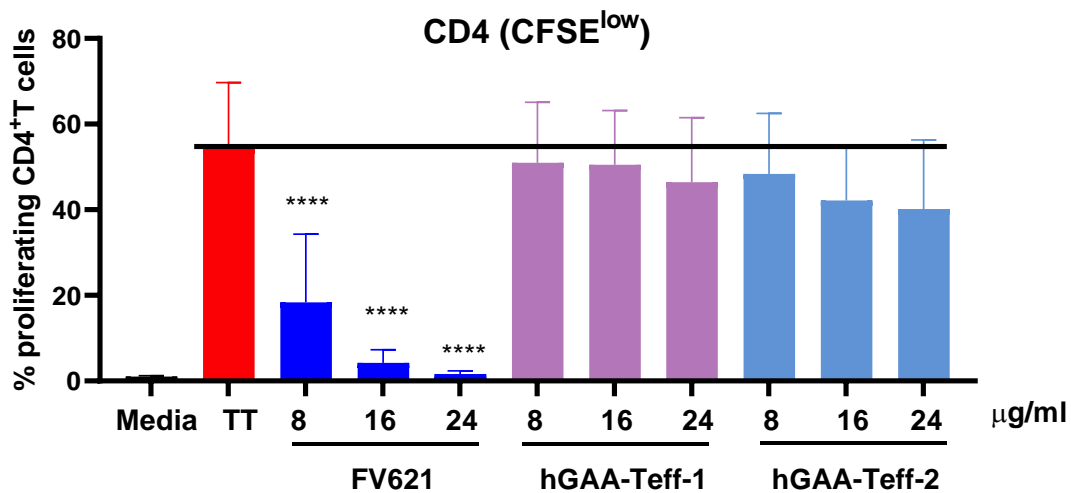

Supplement: DataSheet_1.pdf [file DataSheet_1.pdf]
